# Supplementary material for: Betacyanins obtained from alternative novel sources as natural food colorant additives: incorporated in savory and sweet food products
Source: Royal Society of Chemistry journal article supplement (doi:10.1039/d3fo01660a), 2023-01-01
Supplement: d3fo01660a1.pdf [file d3fo01660a1.pdf]

## Supplemental material

(A)

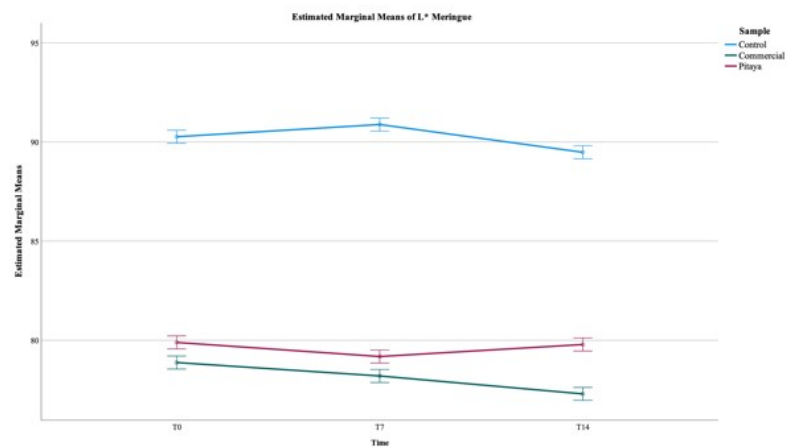

(B)

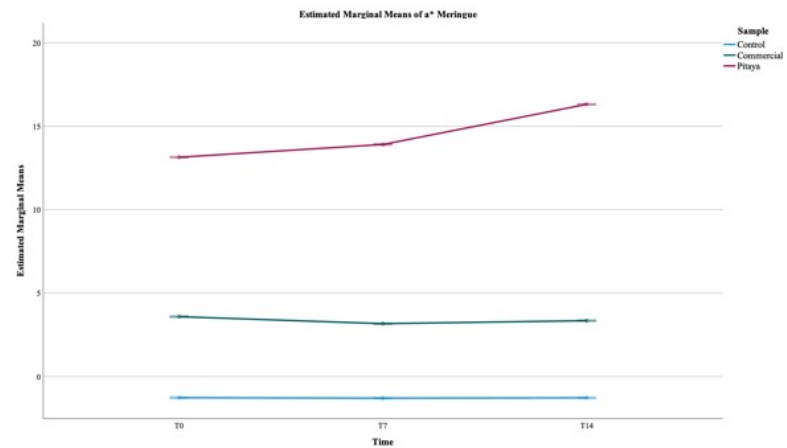

(C)

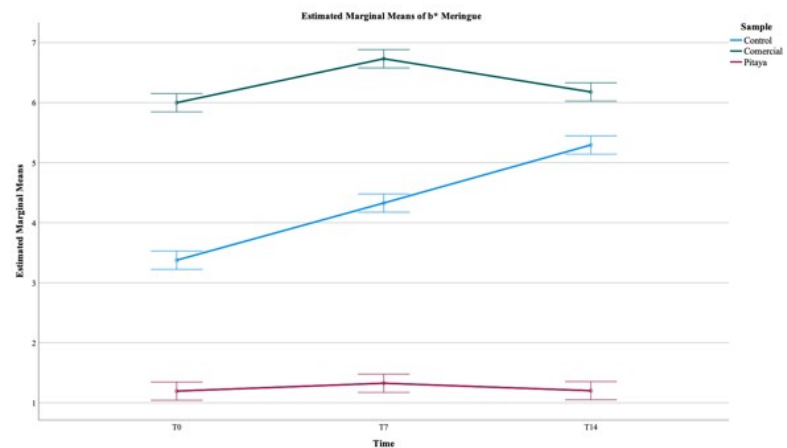

(D)

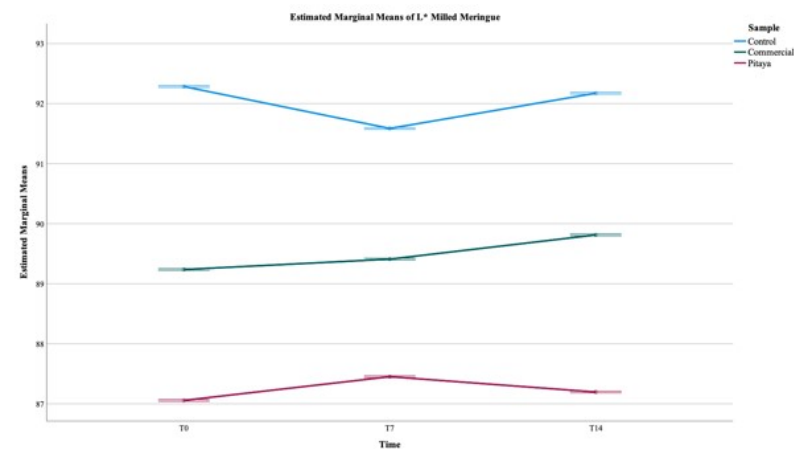

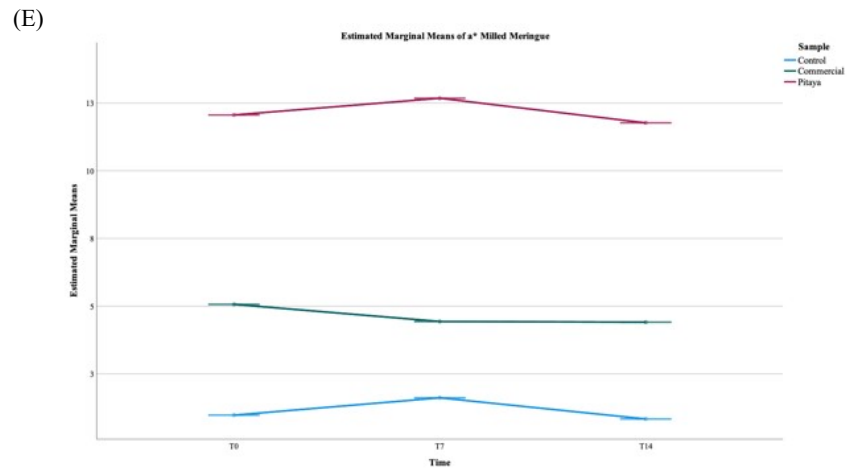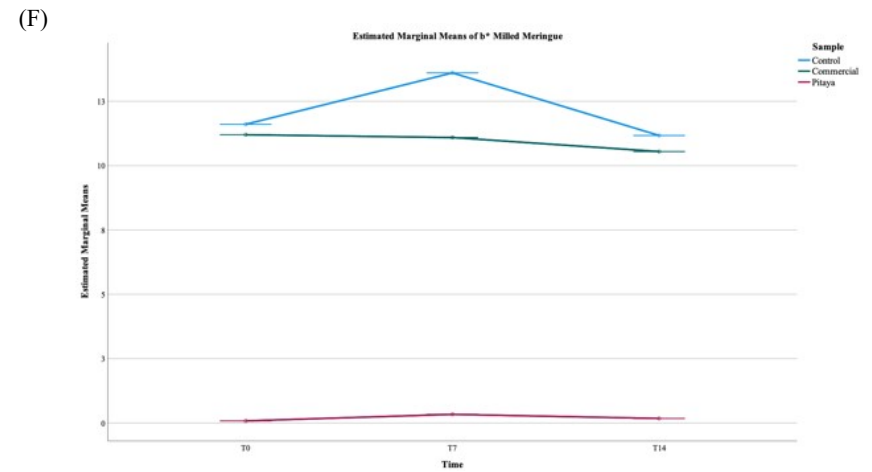

**Figure 1.** EMM plots of external color of Meringue cake (A) L\*, (B) a\*, (C) b\*, and milled Meringue powder, (D) L\*, (E) a\* and (F) b\*.

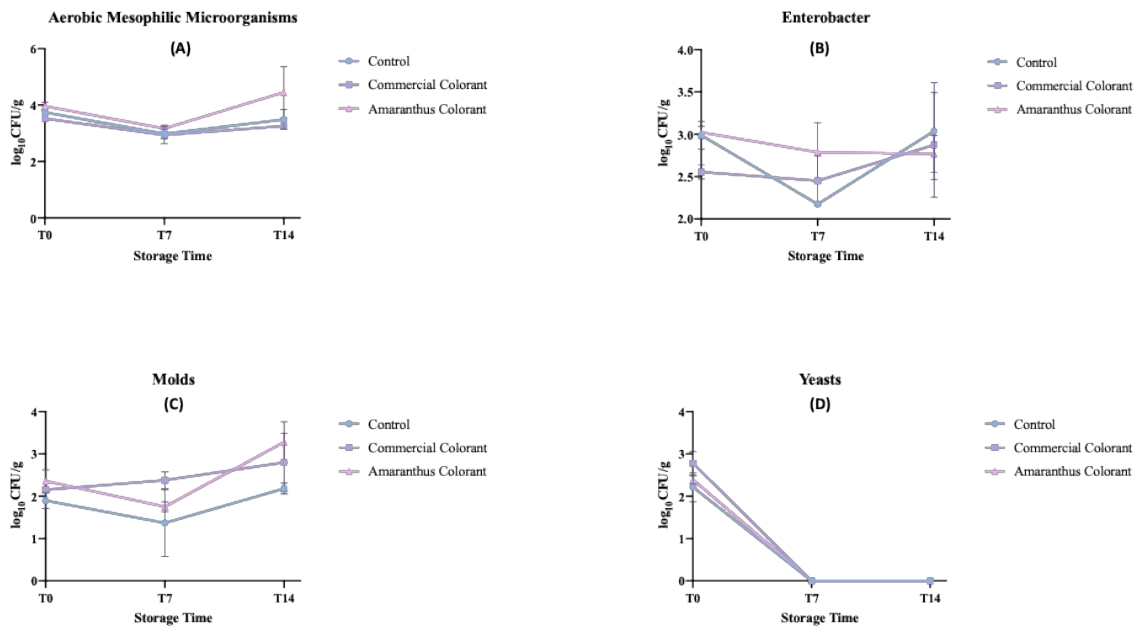

**Figure 2.** Microbial loads over 14 days of storage at room temperature: A) Aerobic mesophilic microorganisms; B) Enterobacter; C) Molds; D) Yeasts.

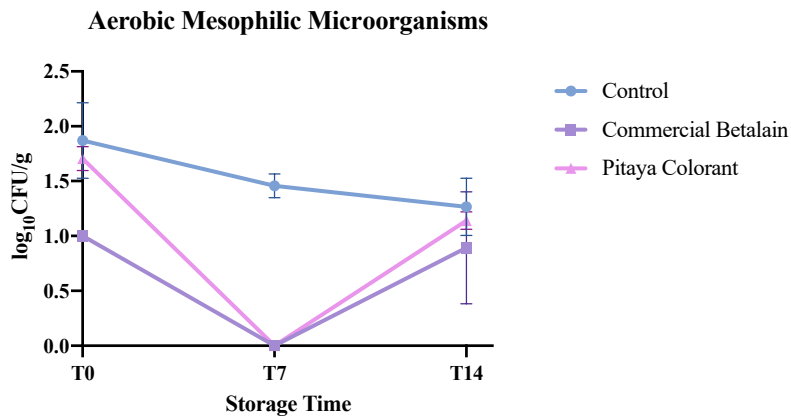

**Figure 3.** Microbial load of aerobic mesophilic microorganisms over 14 days of storage at room temperature.
